# Supplementary material for: Functional characterization of helminth-associated Clostridiales reveals covariates of Treg differentiation
Source: PubMed Central journal article supplement (PMC11084060; doi:10.1186/s40168-024-01793-1), 2024-05-10

Figure S1.

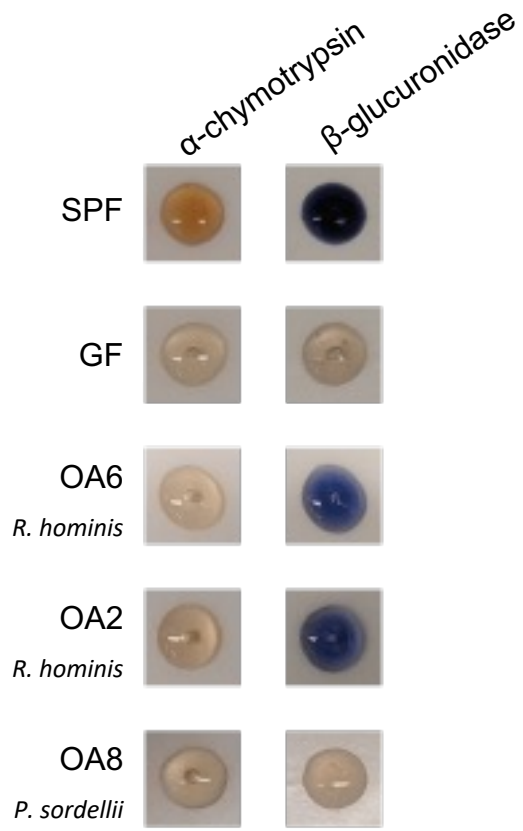

Figure S2.

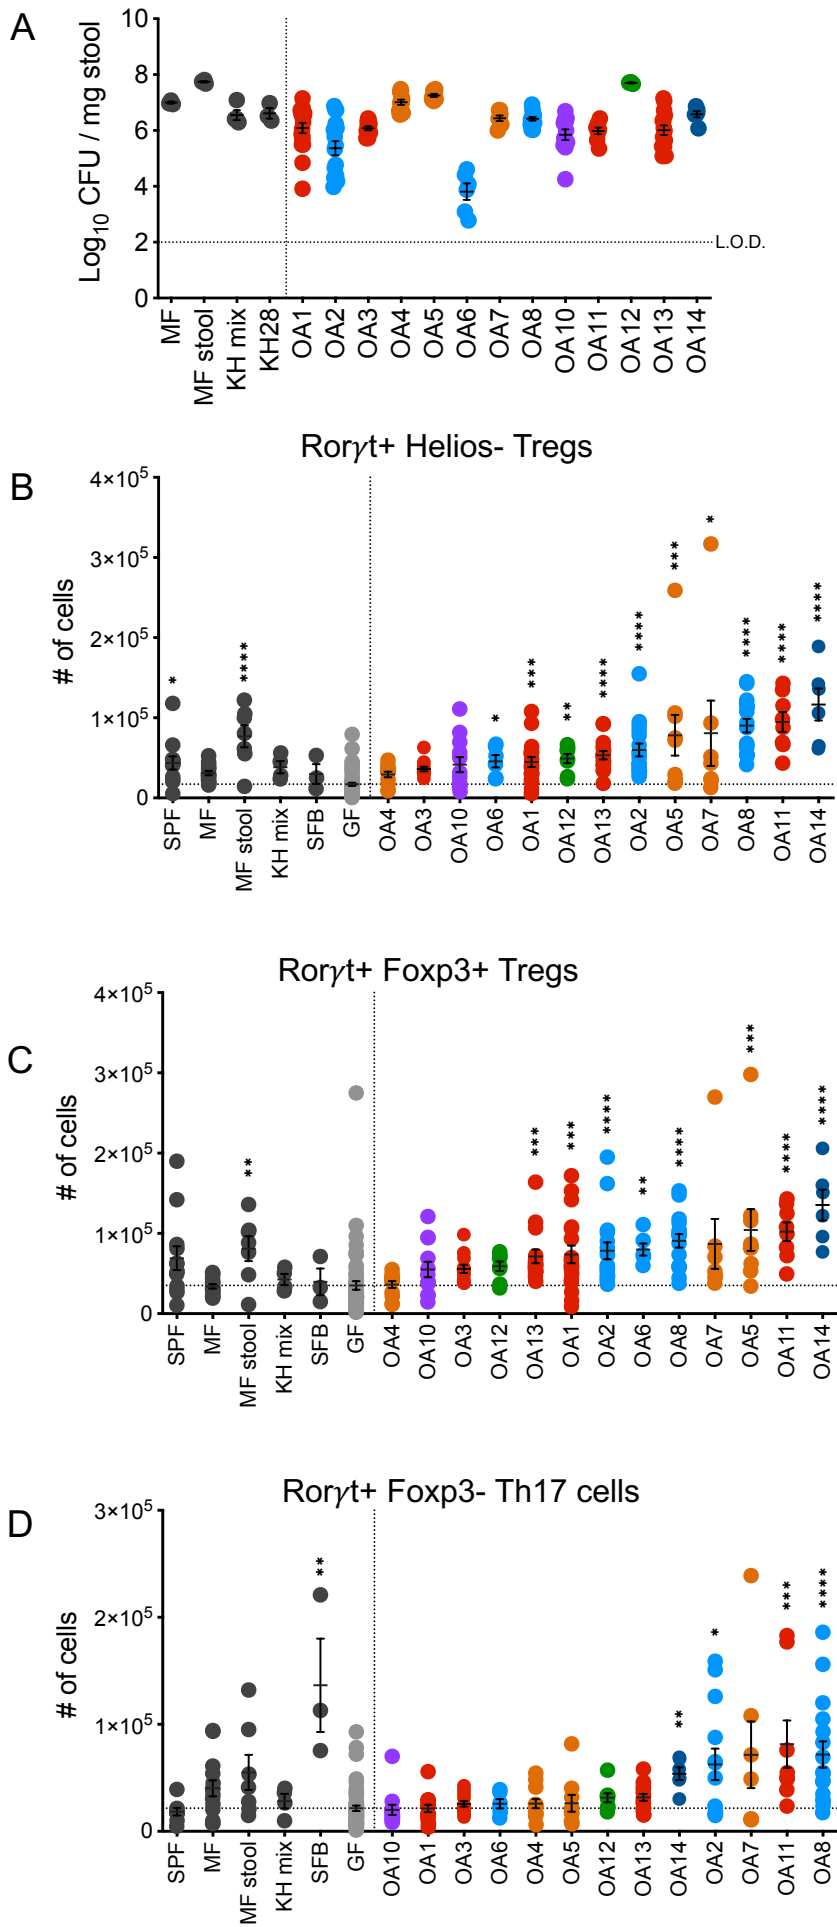

Figure S3.

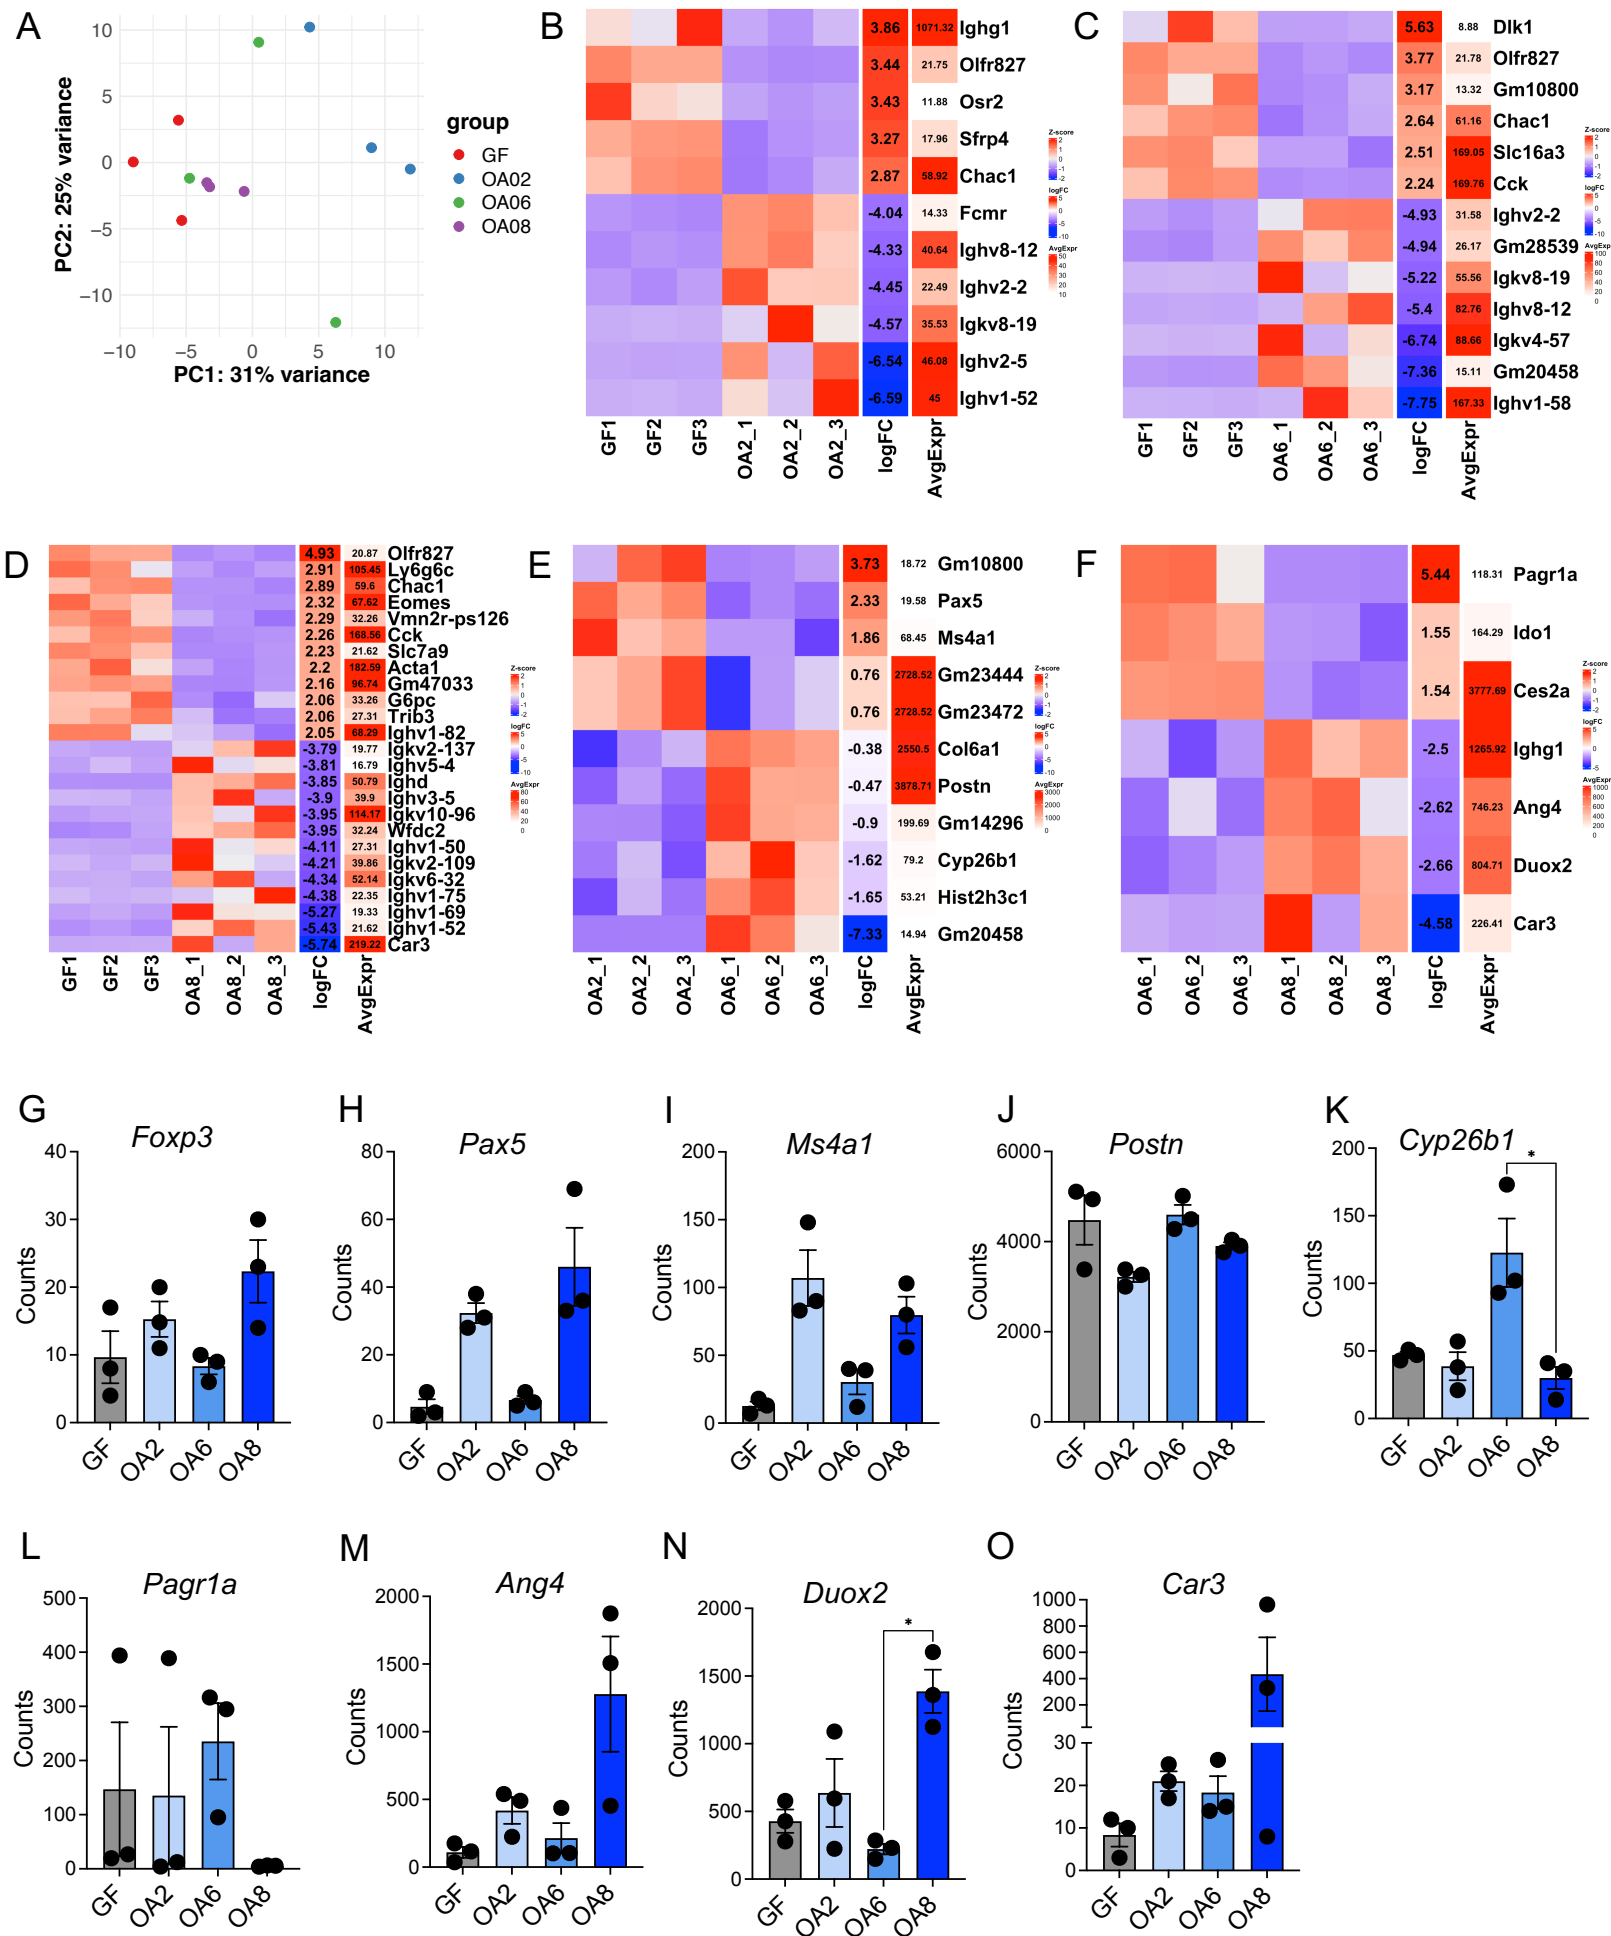

Figure S4.

P

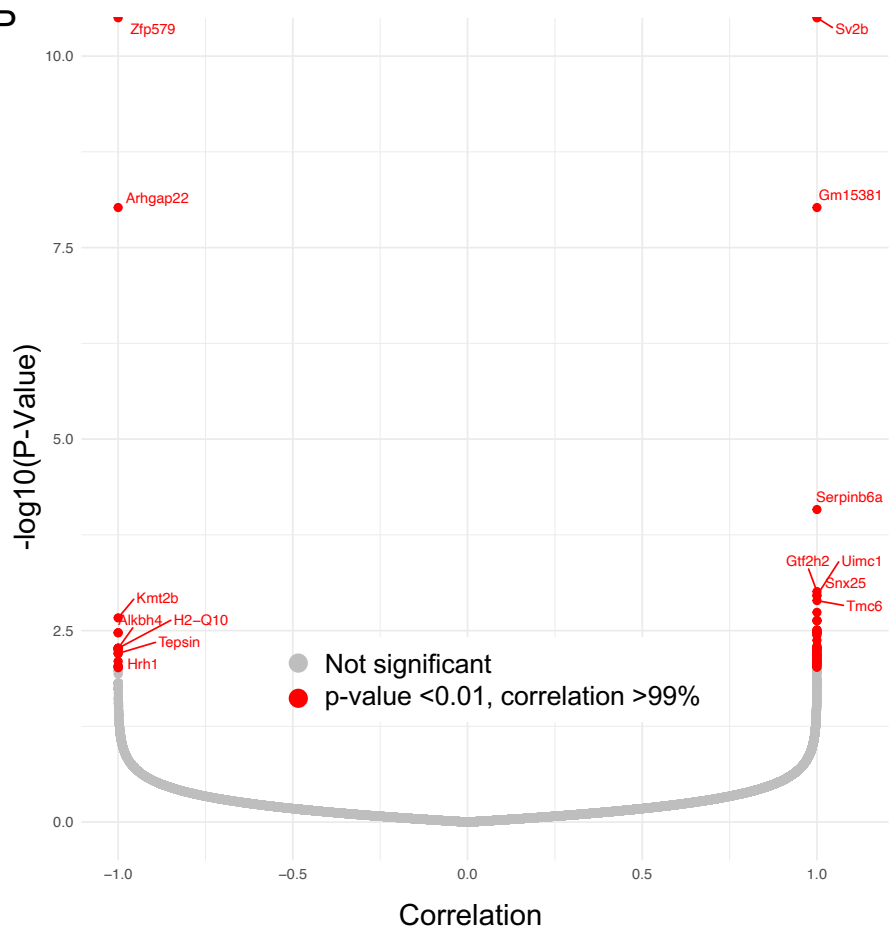

Figure S5.

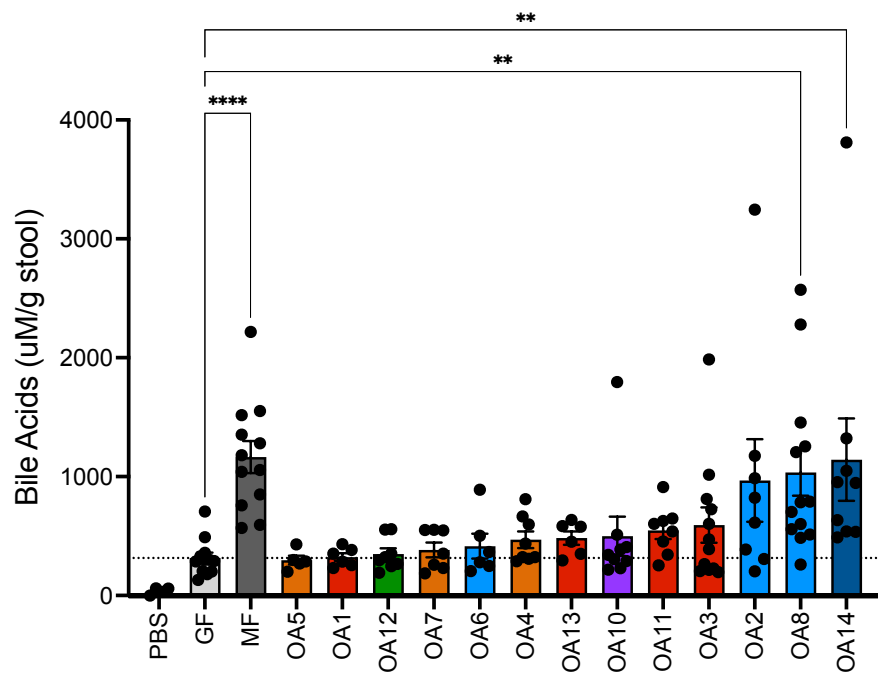

Figure S6.

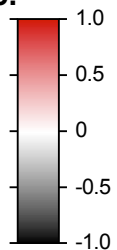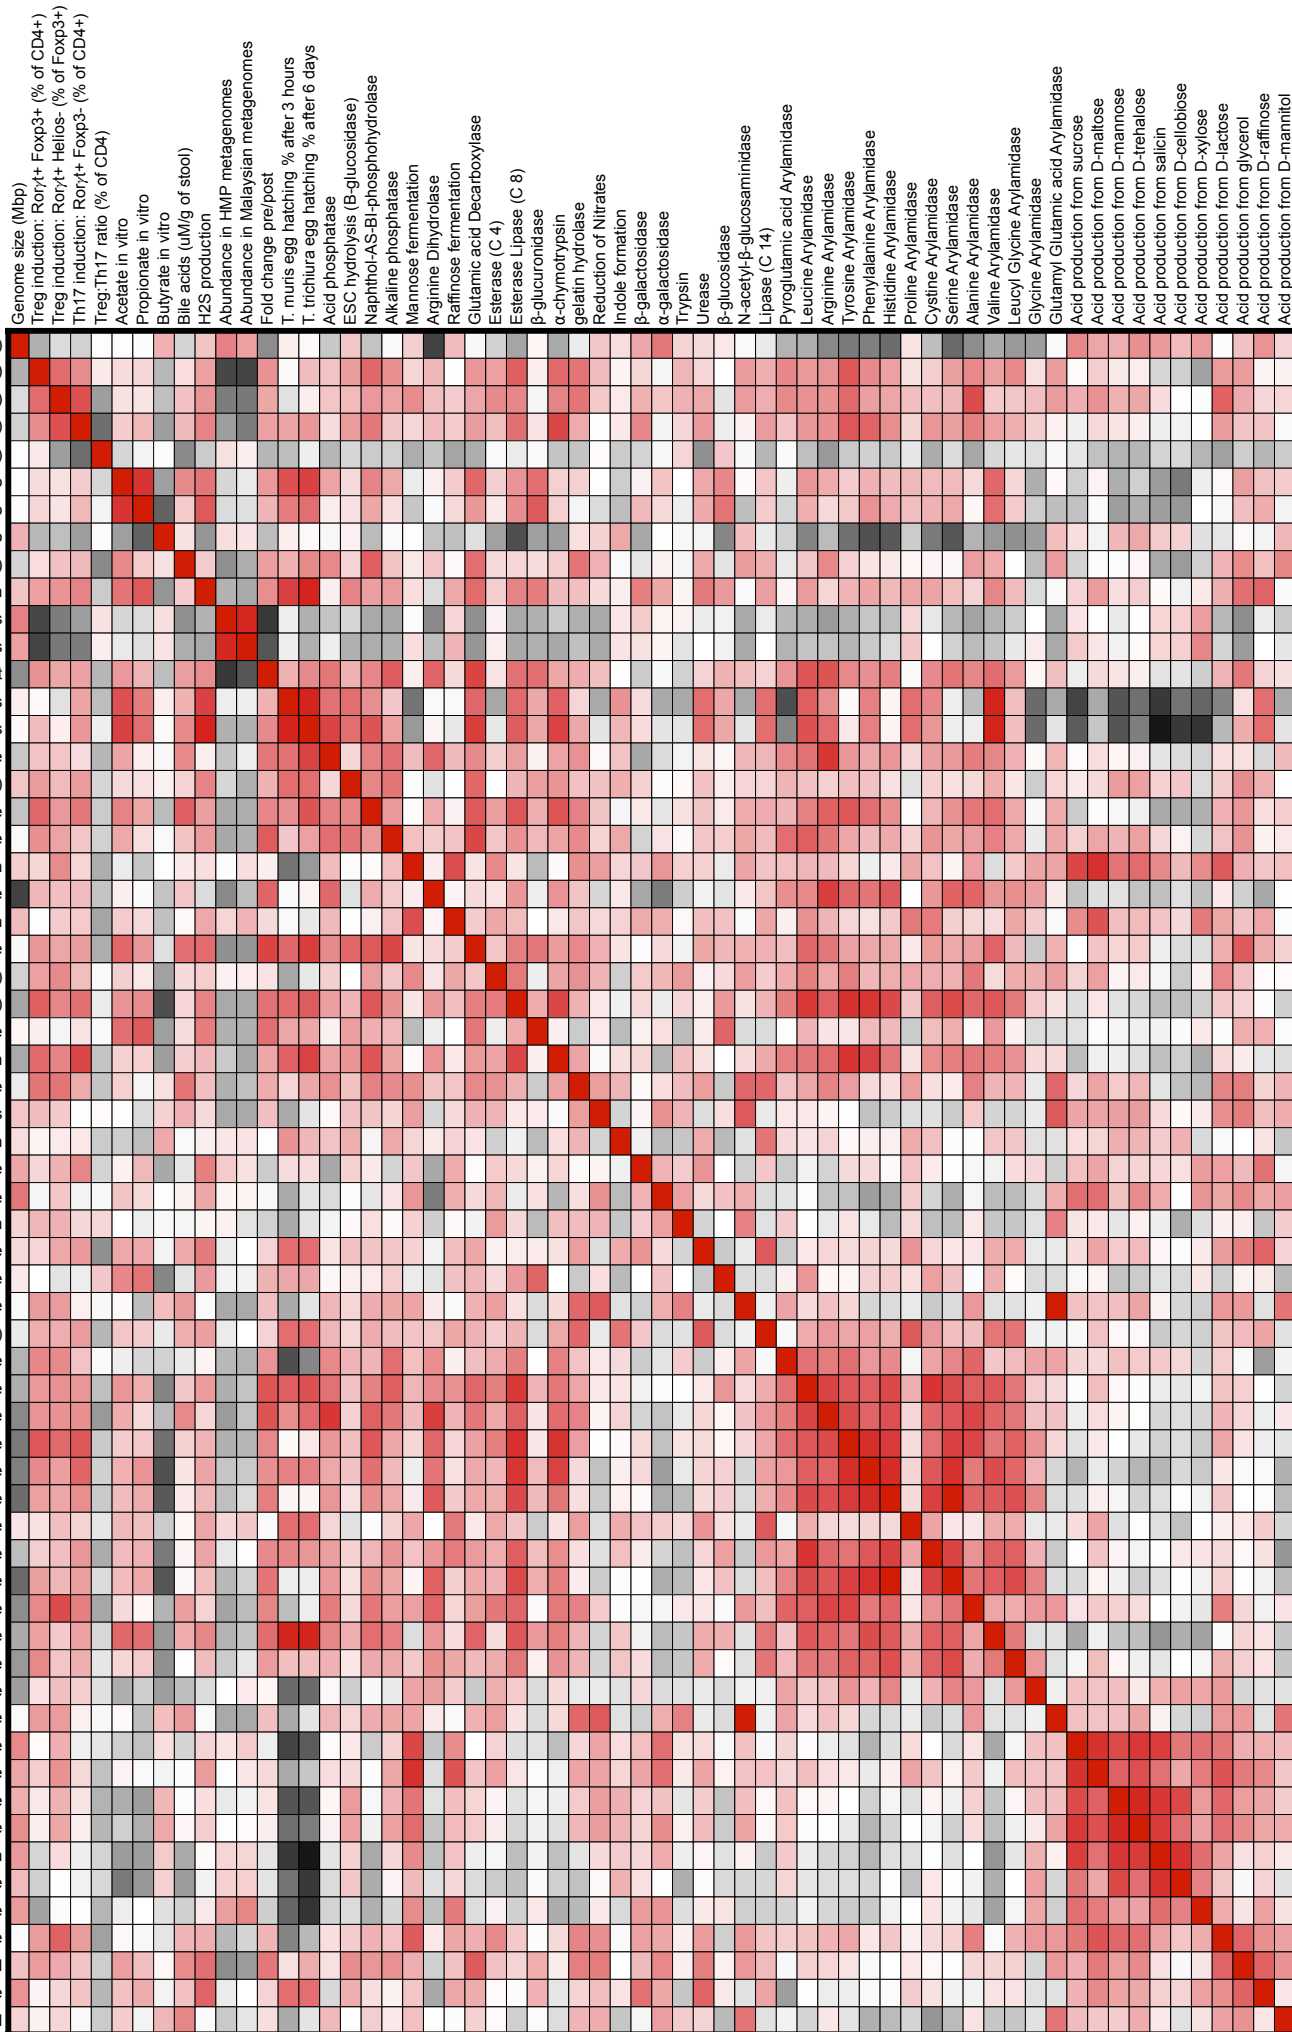

Figure S7.

A

| Explanatory variables used for dbRDA | ANOVA for each explanatory variable |
|--------------------------------------|-------------------------------------|
| Valine arylamidase                   | Pr(>F) = 0.003                      |
| $\alpha$ -chymotrypsin               | Pr(>F) = 0.004                      |
| Alanine Arylamidase                  | Pr(>F) = 0.001                      |
| Tyrosine Arylamidase                 | Not significant                     |
| Esterase Lipase (C 8)                | Pr(>F) = 0.028                      |
| Acid production from D-lactose       | Pr(>F) = 0.002                      |
| Phenylalanine Arylamidase            | Pr(>F) = 0.029                      |
| Naphthol-AS-BI-phosphohydrolase      | Pr(>F) = 0.007                      |
| Gelatin hydrolase                    | Not significant                     |
| Acid production from salicin         | Pr(>F) = 0.049                      |
| Acid production from D-trehalose     | Pr(>F) = 0.045                      |

B

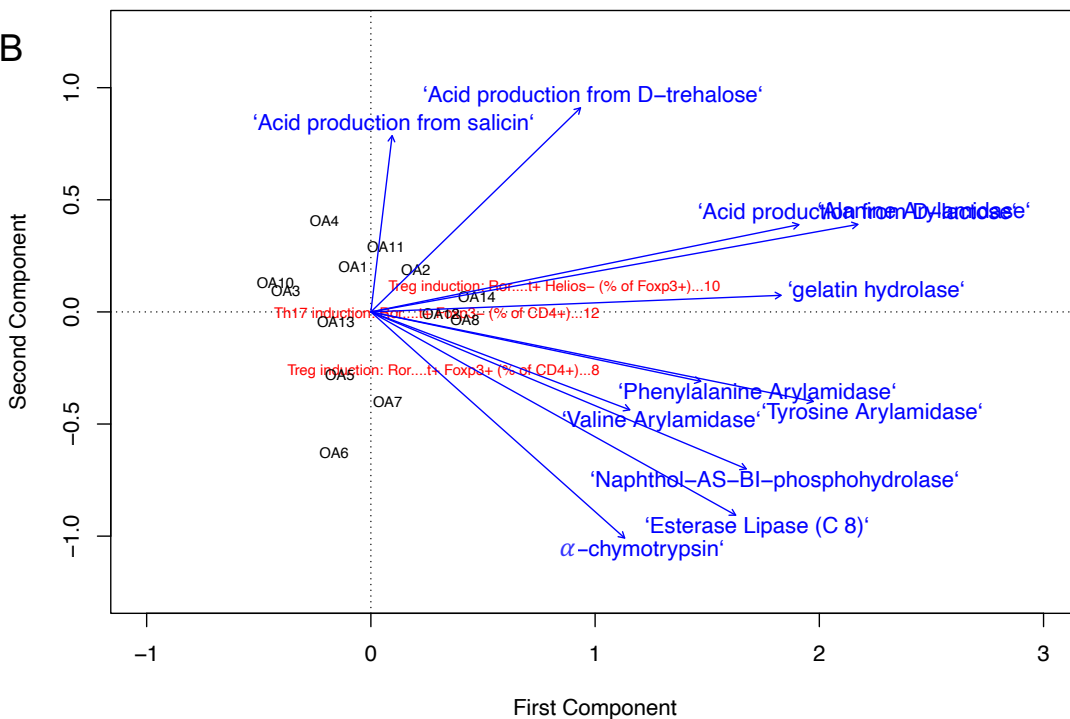

- ANOVA for dbRDA model: Pr(>F) = 0.009
- ANOVA for dbRDA component 1: Pr(>F) = 0.013 Explains 85% of the variance. Component 2 is not significant.
- Proportion of constrained variance > 0.99

C

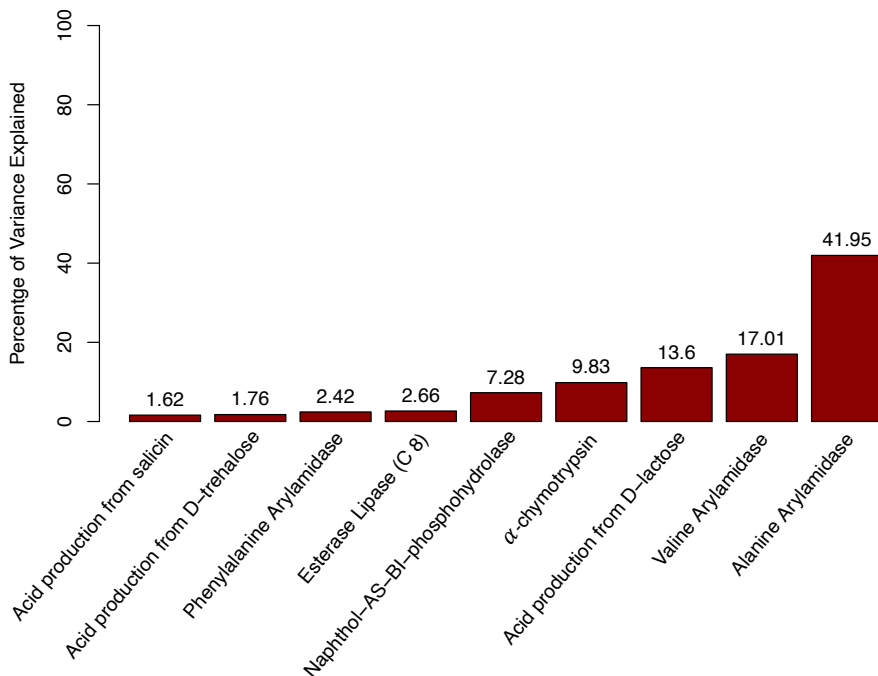

Figure S8.

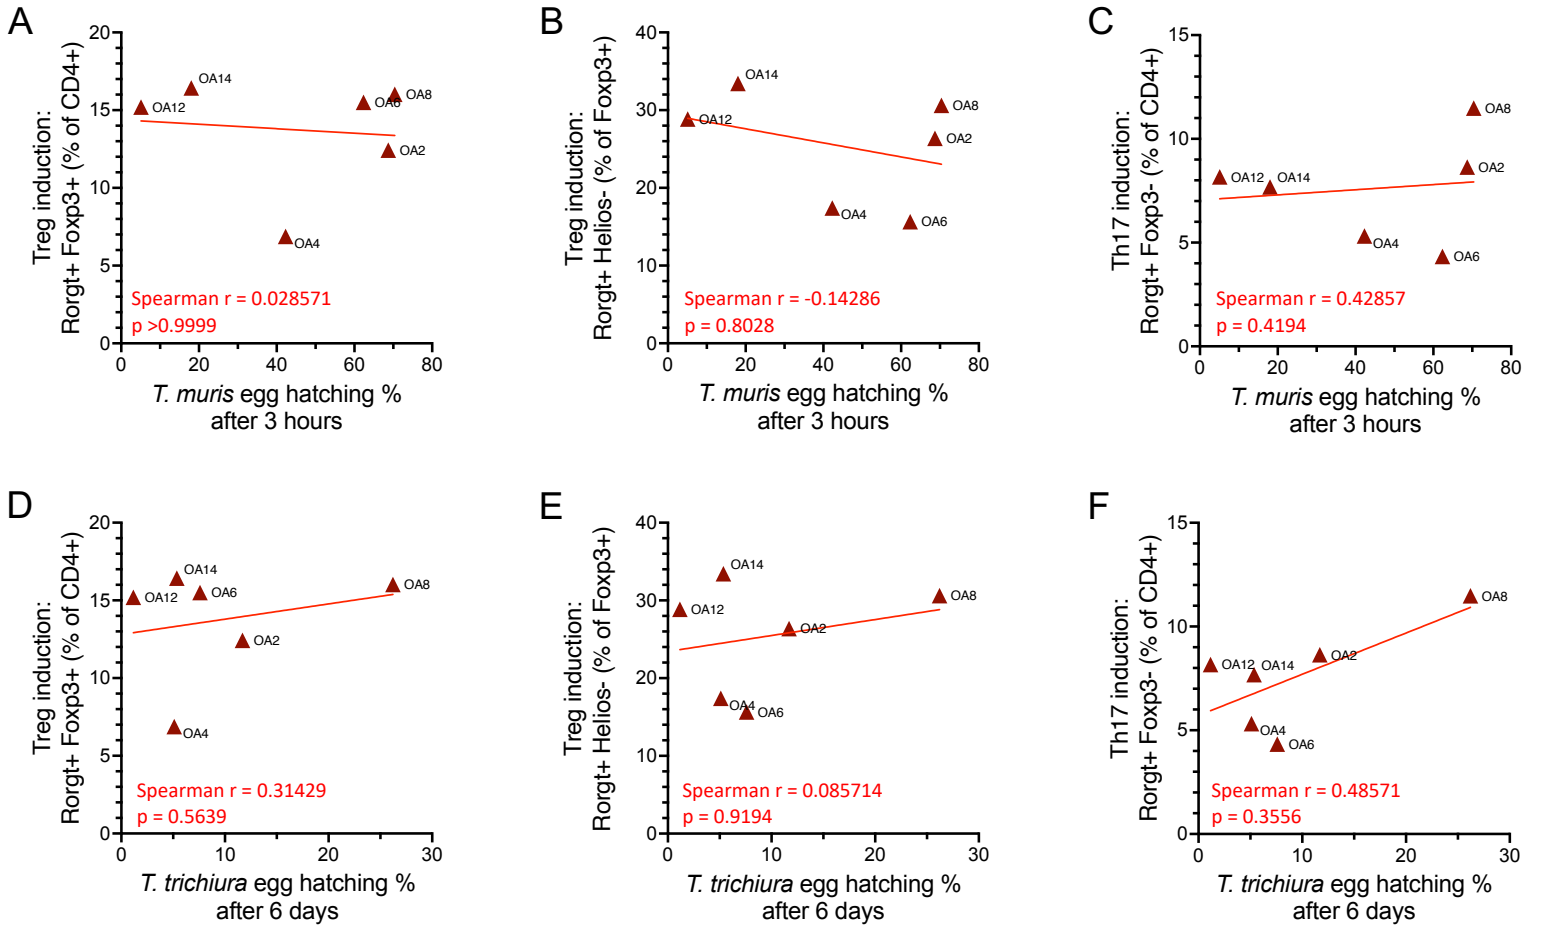

Supplement: 40168_2024_1793_MOESM1_ESM.pdf [file 40168_2024_1793_MOESM1_ESM.pdf]
